# Supplementary material
Source: Springer Nature journal article supplement (https://www.springermedizin.de/resource/supplementary/13033_2012_124_MOESM3_ESM.pdf/9651918)

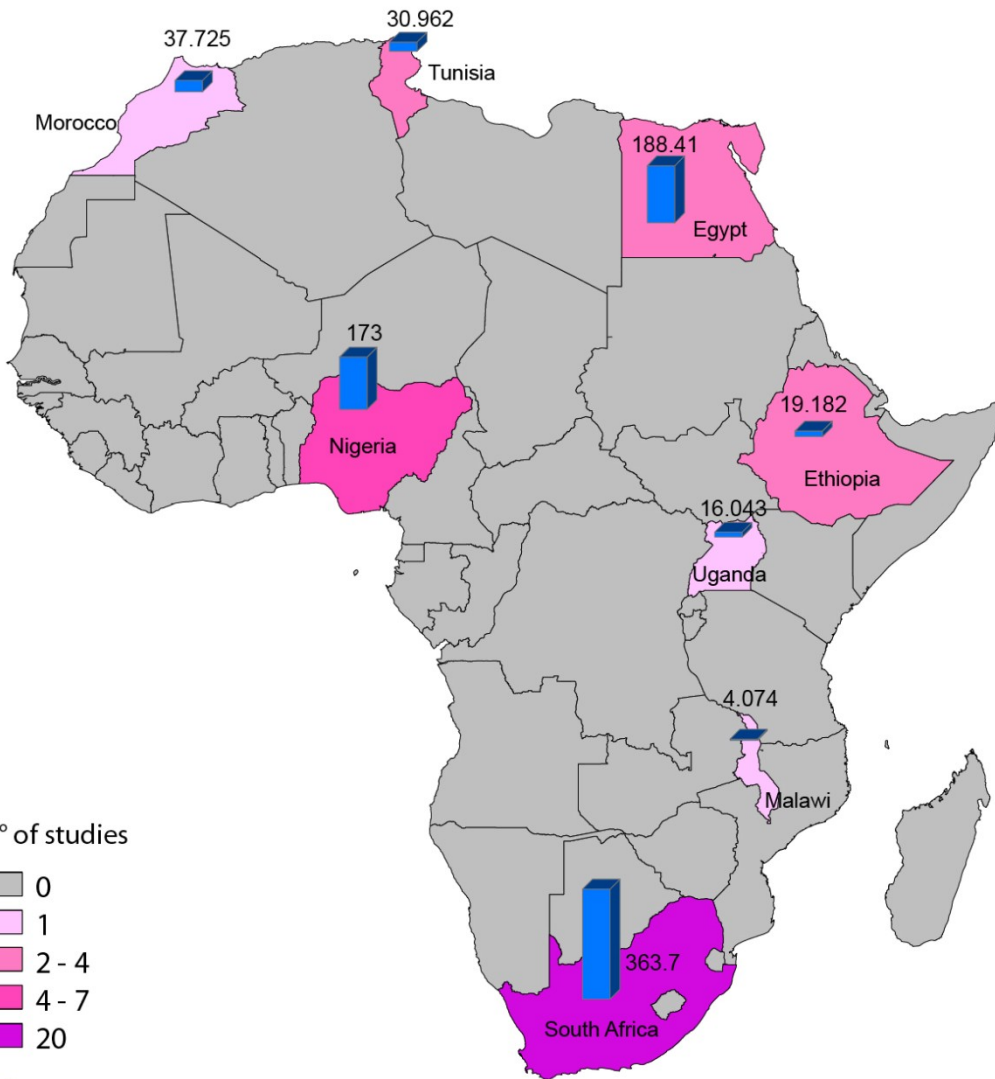

N° of studies

0

1

2 - 4

4 - 7

20

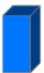

GDP Gross domestic Product (\$ billions)

Supplement: MOESM3 [file 9651918]
